# Supplementary material for: Stressful life events and the metabolic syndrome: the prevalence, prediction and prevention of diabetes (PPP)-Botnia Study.
Source: Oxford University Press journal article supplement (doi:10.2337/dc09-1027), 2010-02-01
Supplement: dc09-1027_online_appendix.pdf [file dc09-1027_online_appendix.pdf]

**Online Appendix Table A1.** Number of stressful life events in men and women.

|                                                                        | <b>Men</b> | <b>Women</b> |          |
|------------------------------------------------------------------------|------------|--------------|----------|
| <b>No (n = 2,296) versus extremely stressful life events:</b>          | n (%)      | n (%)        | <i>P</i> |
| <b>Finance</b>                                                         |            |              |          |
| 1. Ongoing financial strain (n = 213)                                  | 89 (7.0)   | 124 (10.1)   | 0.005    |
| 2. Severe financial strain, laid off business (n = 100)                | 43 (3.5)   | 57 (4.9)     | 0.082    |
| 3. Threat of unemployment or personal bankruptcy (n = 89)              | 44 (3.6)   | 45 (3.9)     | 0.652    |
| <b>Work</b>                                                            |            |              |          |
| 4. Continuous work overload (n = 318)                                  | 145 (10.9) | 173 (13.5)   | 0.036    |
| 5. Troubles with co-workers (n = 167)                                  | 61 (4.9)   | 106 (8.8)    | 0.001    |
| 6. Began a new job (n = 42)                                            | 8 (0.7)    | 34 (3.0)     | 0.001    |
| <b>Social relationships</b>                                            |            |              |          |
| 7. Ongoing difficulties in close relationships (n = 160)               | 51 (4.1)   | 109 (9.0)    | 0.001    |
| 8. Divorced or separated from husband/wife/Partner (n = 153)           | 65 (5.2)   | 88 (7.4)     | 0.024    |
| 9. Death of Spouse/Partner/Close friend (n = 224)                      | 78 (6.1)   | 146 (11.7)   | 0.001    |
| <b>Health</b>                                                          |            |              |          |
| 10. Serious injury or illness (n = 194)                                | 73 (5.8)   | 121 (9.9)    | 0.001    |
| 11. Concern over health of a family member or a close friend (n = 376) | 97 (7.5)   | 279 (20.2)   | 0.001    |
| 12. Concern over own or child's ability to cope with stress (n = 210)  | 59 (4.7)   | 151 (12.0)   | 0.001    |
| <b>Housing</b>                                                         |            |              |          |
| 13. Loss of home (n = 26)                                              | 15 (1.2)   | 11 (1.0)     | 0.555    |
| 14. Change of residence (n = 58)                                       | 18 (1.5)   | 40 (3.5)     | 0.002    |
| 15. Difficulties in housing (n = 22)                                   | 9 (0.8)    | 13 (1.2)     | 0.306    |

Note. No stressful life events refer to a category combining individuals who report no stressful life events or life events that are not at all or mildly stressful; Extremely stressful life events refer to a category combining individuals who report moderately or extremely stressful life events; Number of individuals in parenthesis refer to the number reporting extremely stressful life events. P-values are derived from  $\chi^2$ -tests.

**Online Appendix Table A2.** Accumulation of stressful life events in men and women.

|                                                                               | Men        | Women      |       |
|-------------------------------------------------------------------------------|------------|------------|-------|
| <b>No (n = 2,296) versus accumulation of extremely stressful life events:</b> | n (%)      | n (%)      | P     |
| <b>Finance</b>                                                                |            |            |       |
| at least 1 event (n = 273)                                                    | 121 (9.2)  | 152 (12.1) | 0.018 |
| at least 2 events (n = 98)                                                    | 43 (3.5)   | 55 (4.7)   | 0.121 |
| at least 3 events (n = 31)                                                    | 12 (1.0)   | 19 (1.7)   | 0.145 |
| <b>Work</b>                                                                   |            |            |       |
| at least 1 event (n = 421)                                                    | 179 (13.1) | 242 (18.0) | 0.001 |
| at least 2 events (n = 97) *                                                  | 33 (2.7)   | 64 (5.5)   | 0.001 |
| <b>Social relationships</b>                                                   |            |            |       |
| at least 1 event (n = 425)                                                    | 143 (10.7) | 282 (20.3) | 0.001 |
| at least 2 events (n = 98) †                                                  | 41 (3.3)   | 57 (4.9)   | 0.052 |
| <b>Health</b>                                                                 |            |            |       |
| at least 1 event (n = 592)                                                    | 185 (13.4) | 407 (26.9) | 0.001 |
| at least 2 events (n = 155)                                                   | 36 (2.9)   | 119 (9.7)  | 0.001 |
| at least 3 events (n = 33)                                                    | 8 (0.7)    | 25 (2.2)   | 0.002 |
| <b>Housing</b>                                                                |            |            |       |
| at least 1 event (n = 86) ‡                                                   | 30 (2.5)   | 56 (4.8)   | 0.002 |
| <b>Across all life domains</b>                                                |            |            |       |
| at least 1 event (n = 1111)                                                   | 427 (26.4) | 684 (38.2) | 0.001 |
| at least 2 events (n = 583)                                                   | 201 (14.4) | 382 (25.7) | 0.001 |
| at least 3 events (n = 300)                                                   | 102 (7.9)  | 198 (15.2) | 0.001 |
| at least 4 events (n = 174)                                                   | 54 (4.3)   | 120 (9.8)  | 0.001 |
| at least 5 events (n = 88)                                                    | 31 (2.5)   | 57 (4.9)   | 0.002 |
| at least 6 events (n = 45) §                                                  | 20 (1.7)   | 25 (2.2)   | 0.323 |

Note. No stressful life events refer to a category combining individuals who report no stressful life events or life events that are not at all or mildly stressful; Extremely stressful life events refer to a category combining individuals who report moderately or extremely stressful life events; Number of individuals in parenthesis refer to number reporting extremely stressful life events; \* Number of participants reporting at least 3 events was 9, therefore this category is not analysed separately; † Number of participants reporting at least 3 events was 14, therefore this category is not analysed separately; ‡ Number of participants reporting at least 2 events was 20, therefore this category is not analysed separately; § Number of participants reporting at least 7 events was 25, therefore this category is not analysed separately. P-values are derived from  $\chi^2$ -tests.
